# Supplementary material for: Production and characterization of novel ssRNA bacteriophage virus-like particles from metagenomic sequencing data
Source: PubMed Central journal article supplement (PMC6513524; doi:10.1186/s12951-019-0497-8), 2019-05-13
Supplement: 12951_2019_497_MOESM2_ESM.pdf [file 12951_2019_497_MOESM2_ESM.pdf]

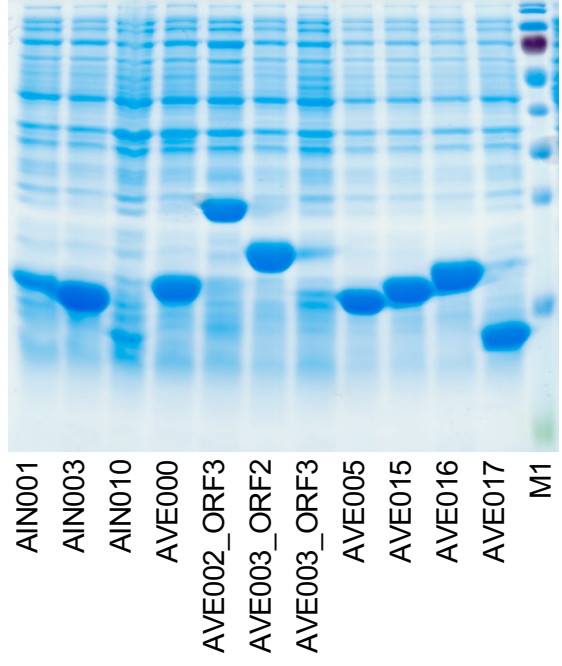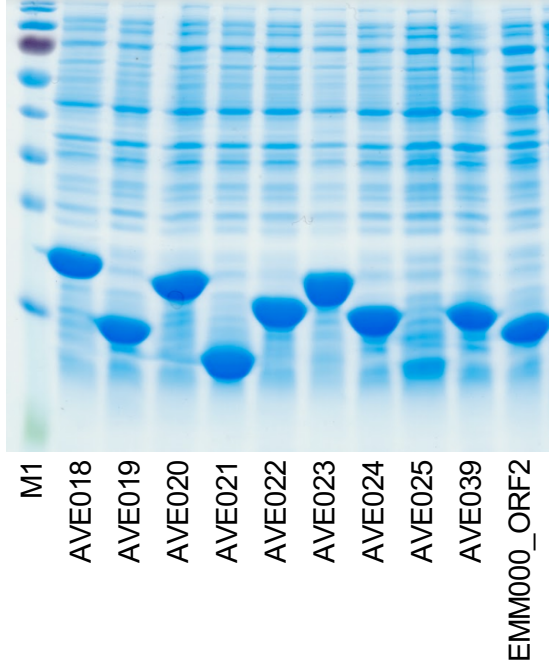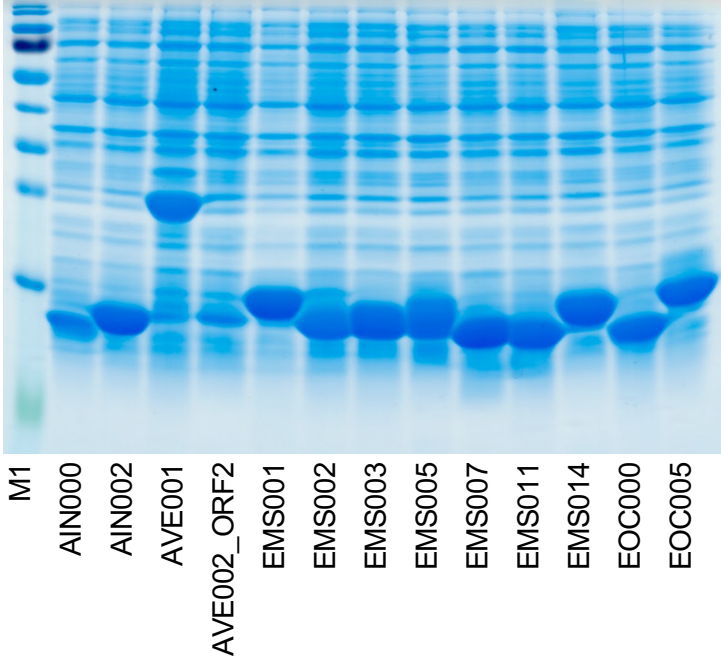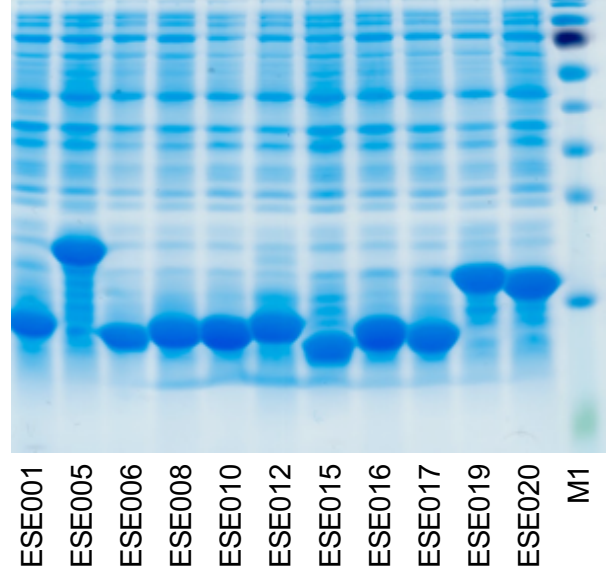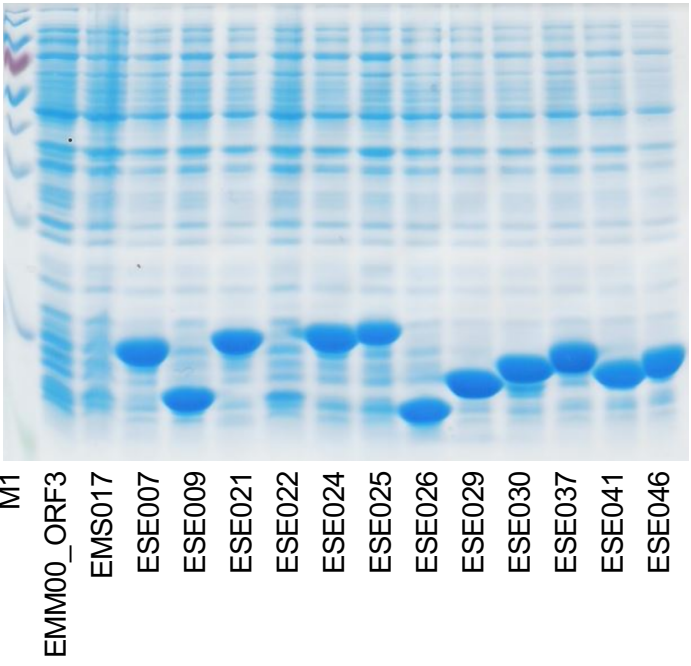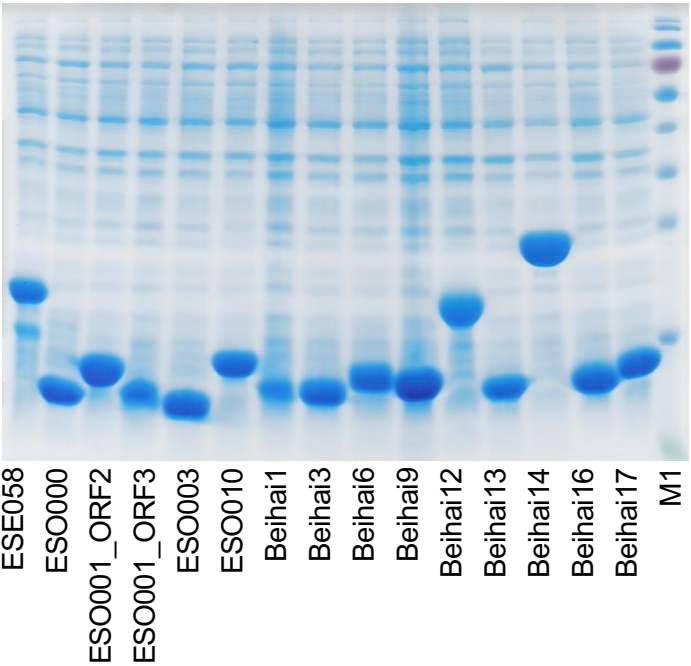

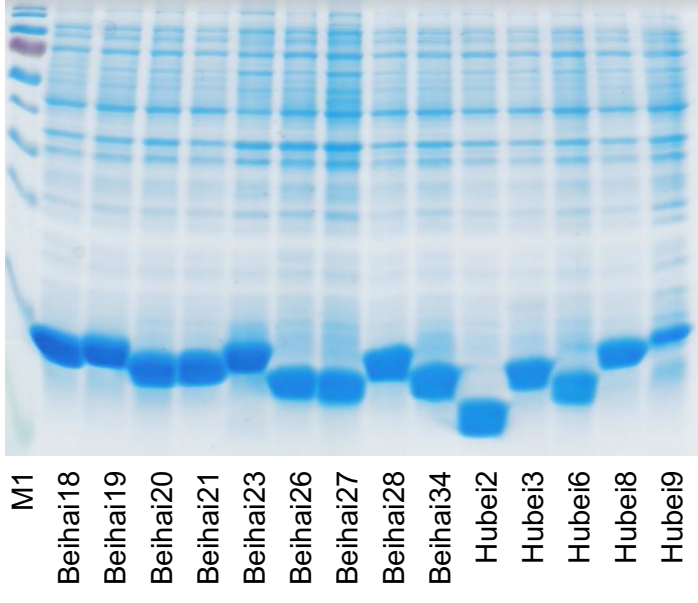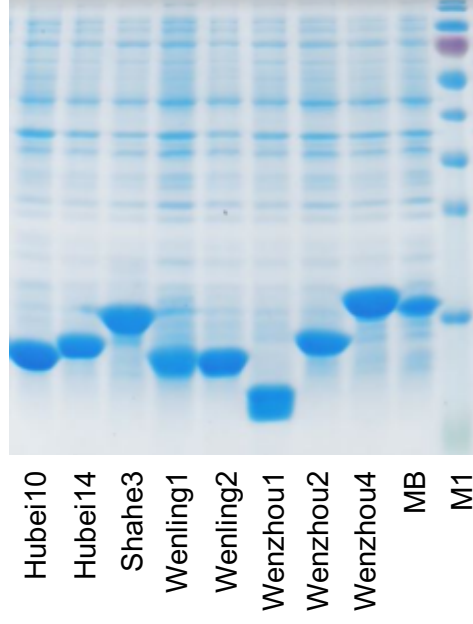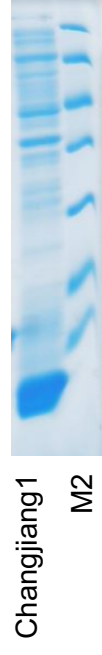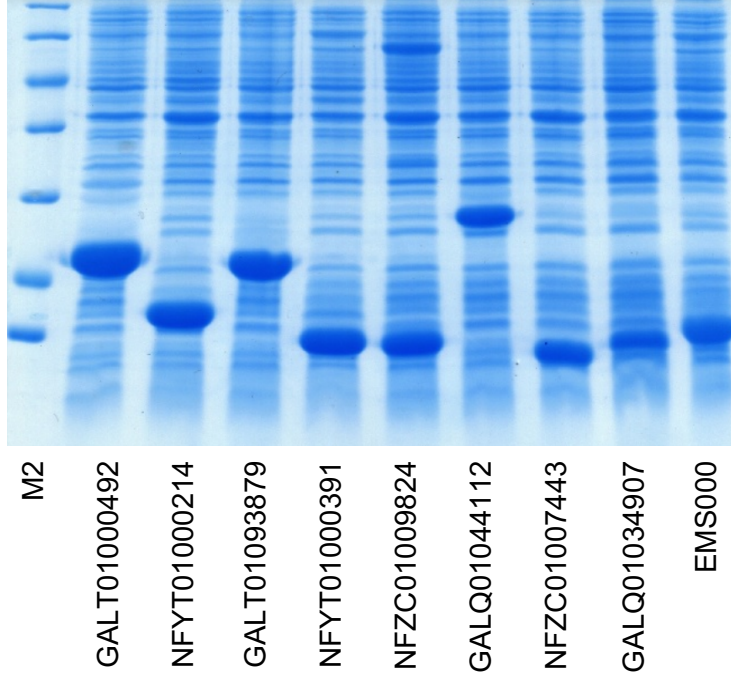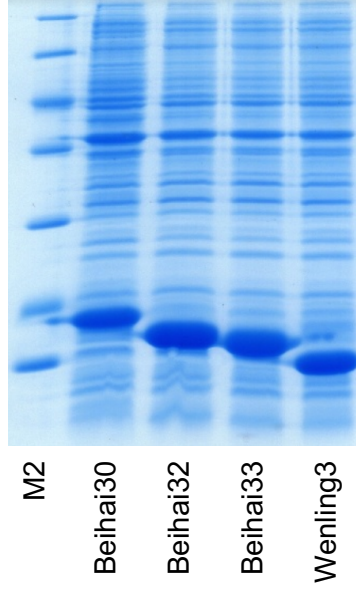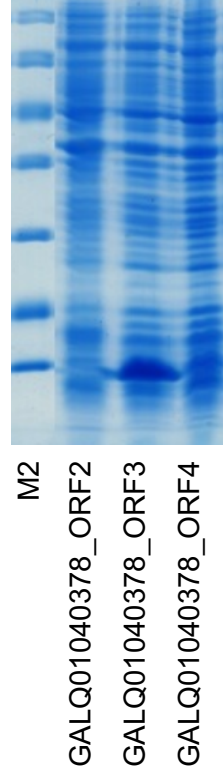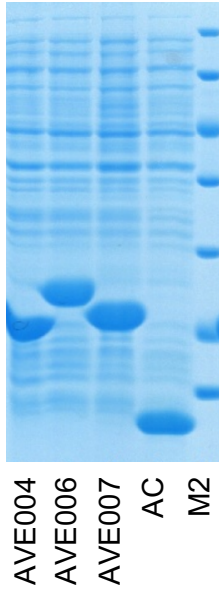

**Figure S1.** SDS-PAGE analysis of the production level of the metagenomic ssRNA phage CPs. The samples represent total cellular protein content four hours after the CP expression was induced at 37 °C. 1 and M2 – protein molecular weight markers (M1: bands of 10, 15, 25, 35, 40, 55, 70, 100, 130 and 180 kDa; M2: bands of 14, 18, 25, 35, 45, 66 and 116 kDa).

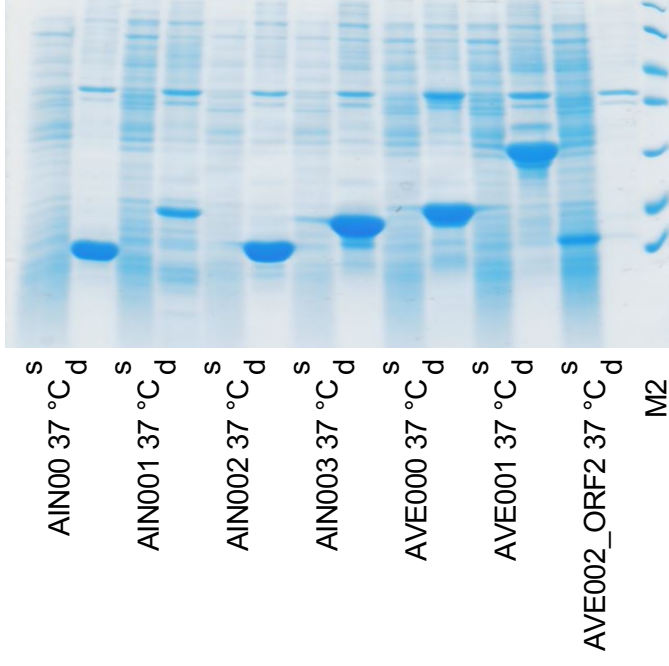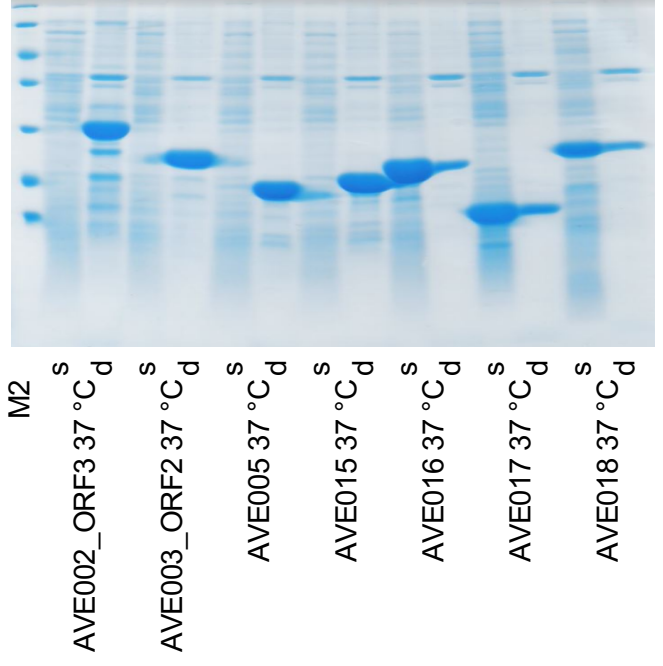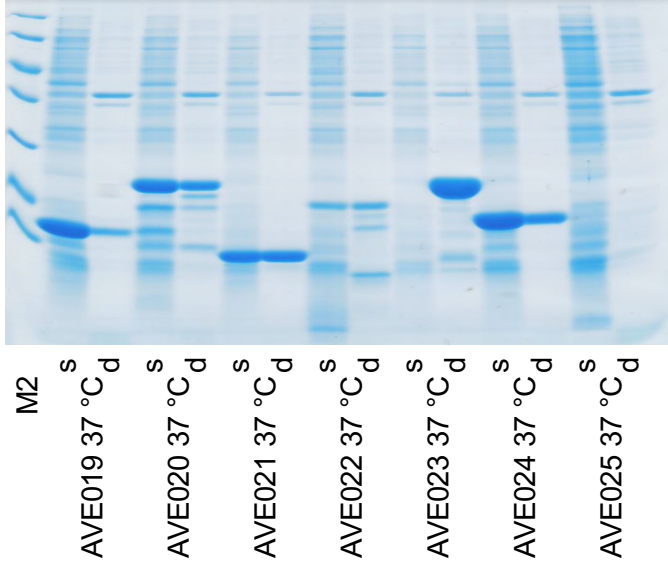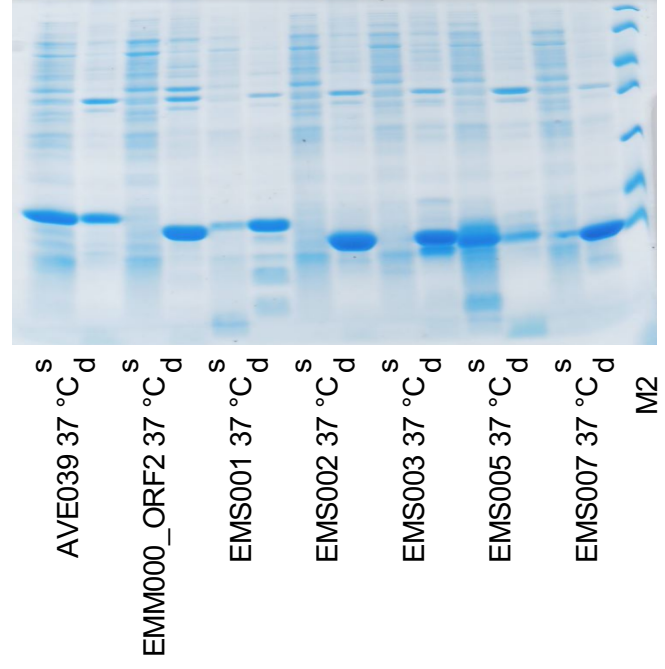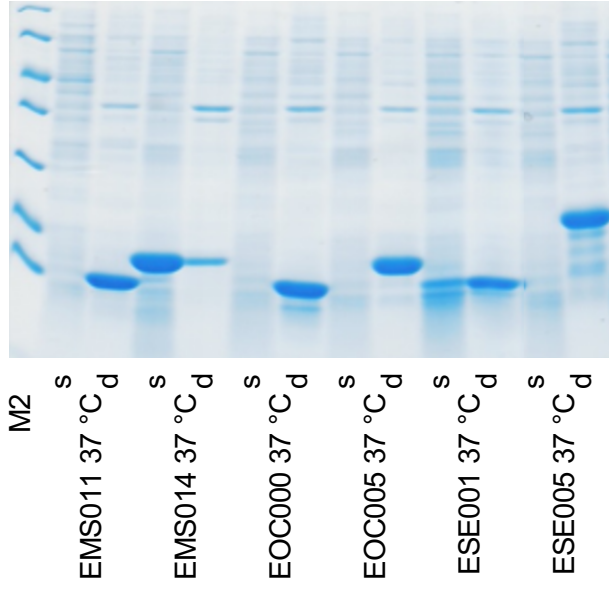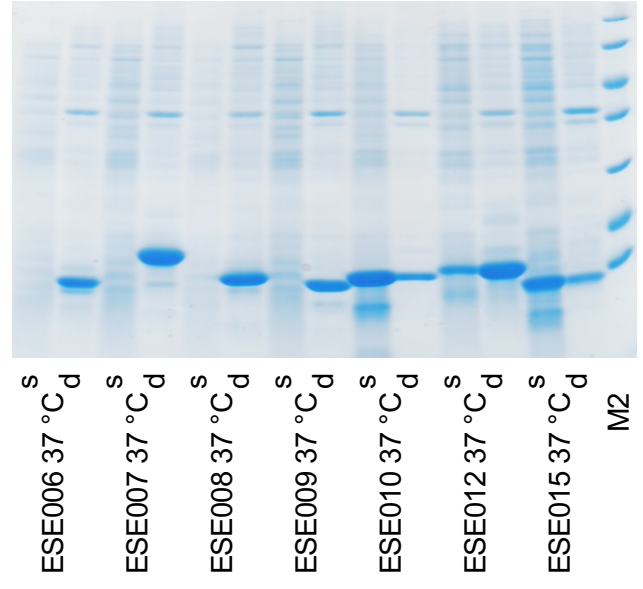

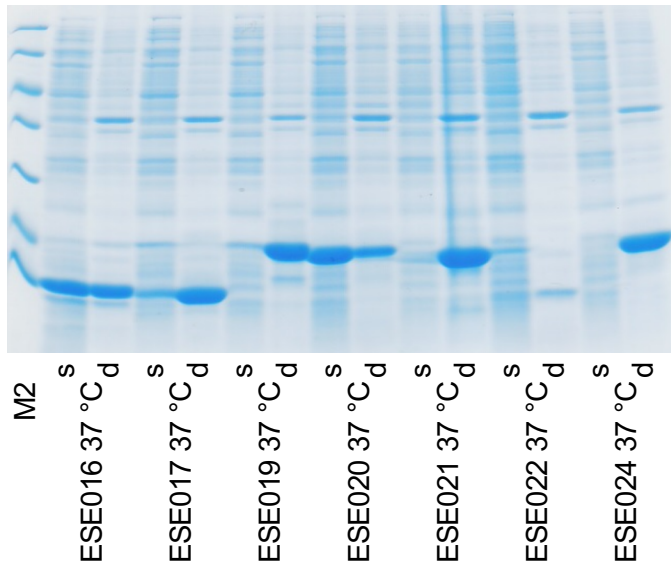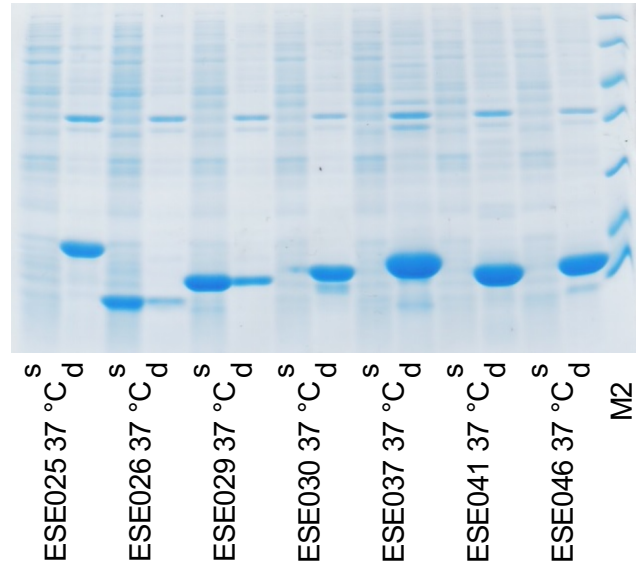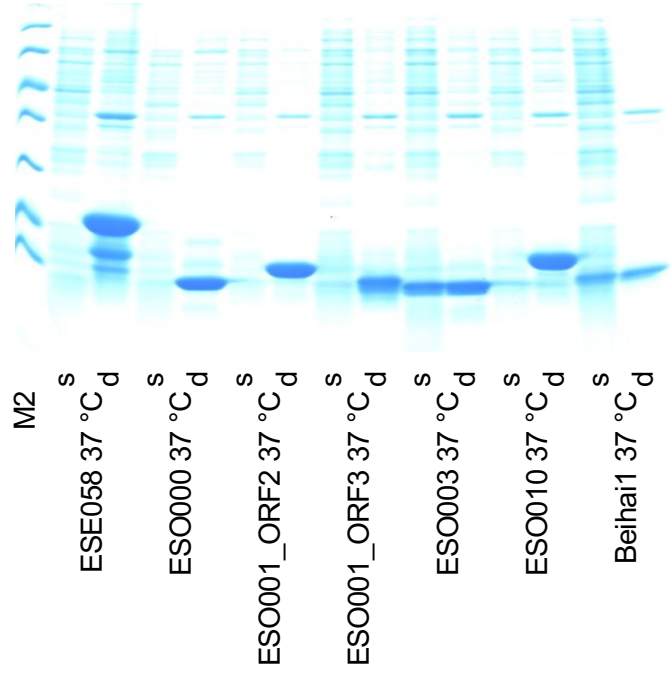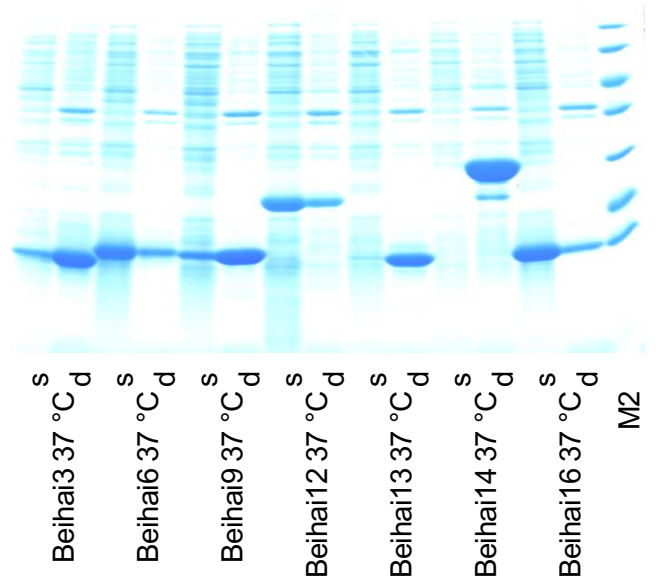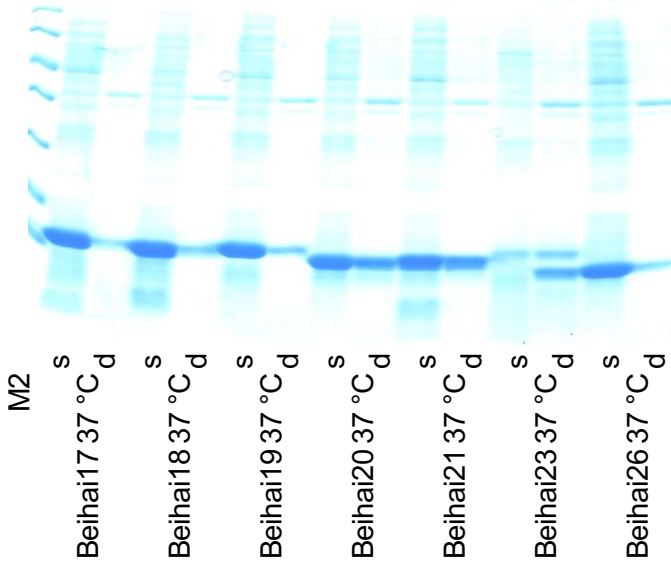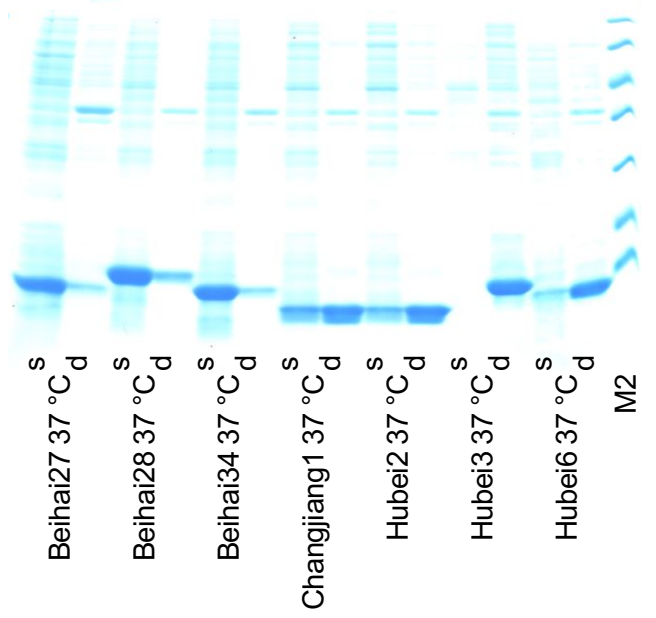

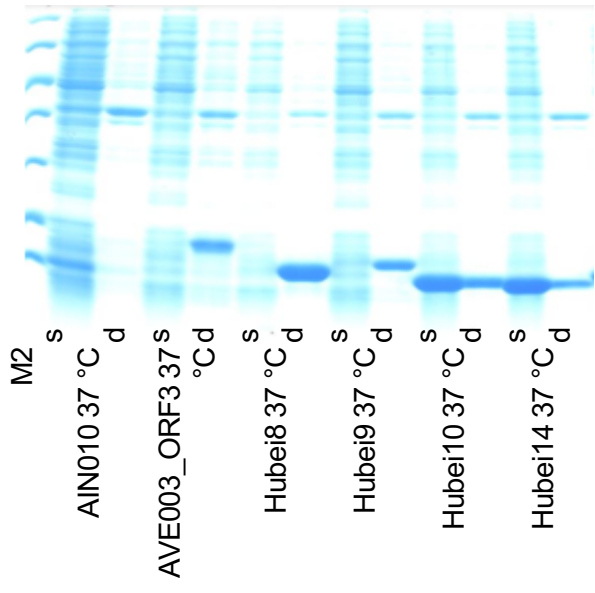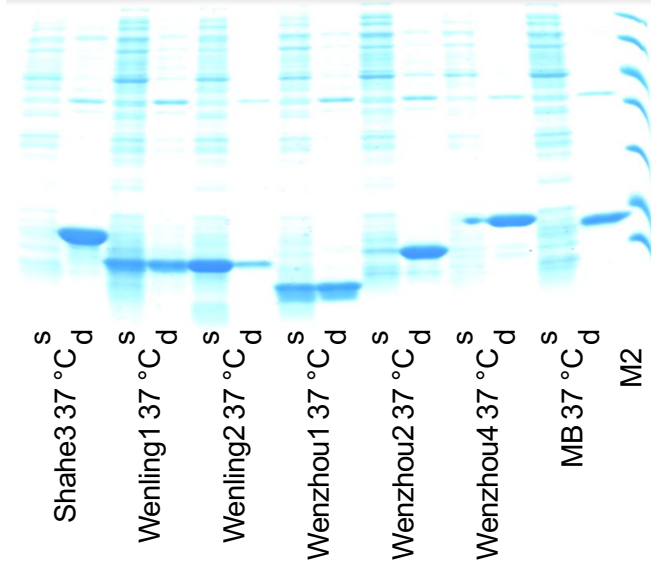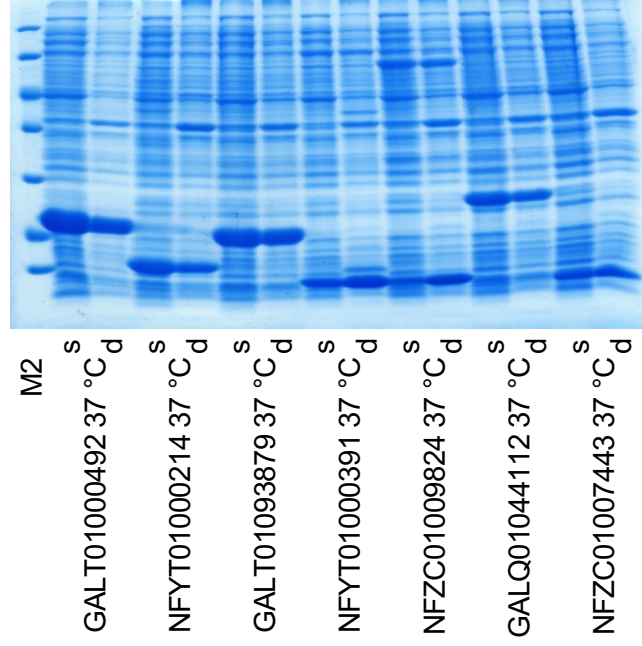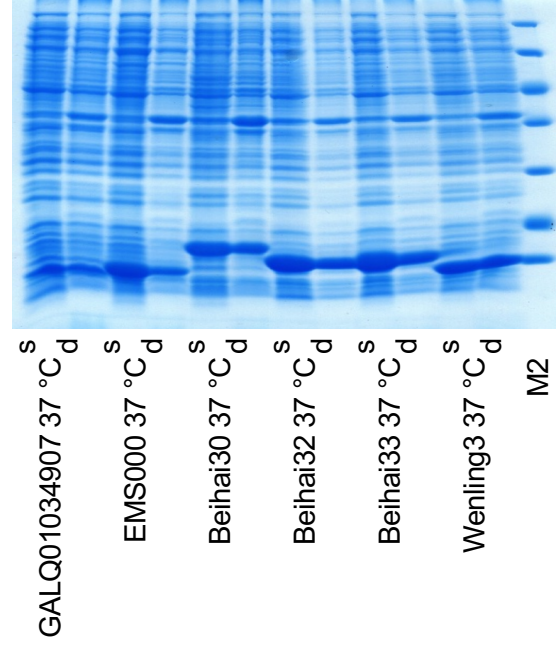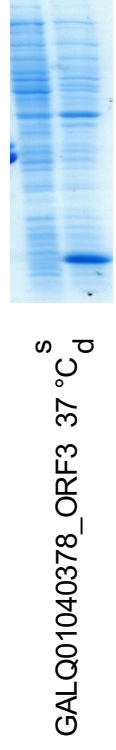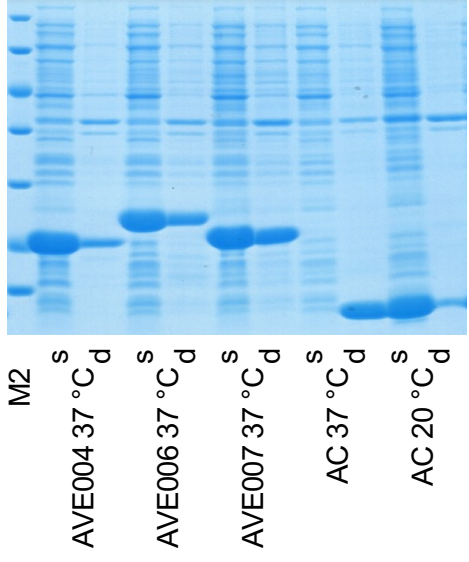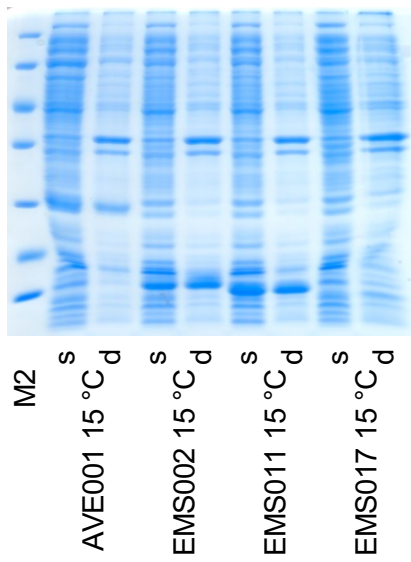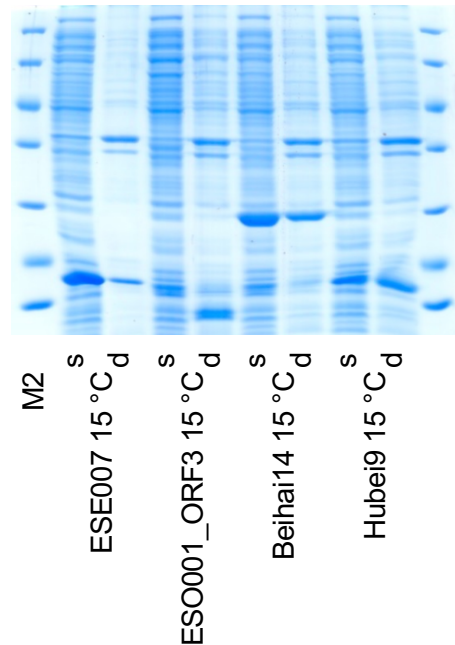

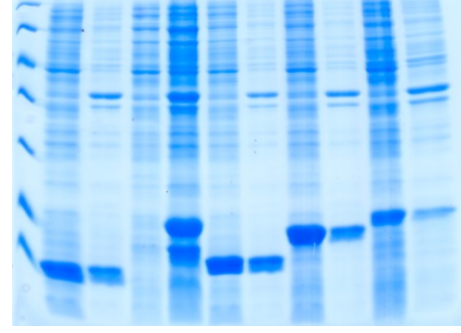

M2  
AIN000 15 °C  
AIN001 15 °C  
AIN002 15 °C  
AIN003 15 °C  
AVE000 15 °C

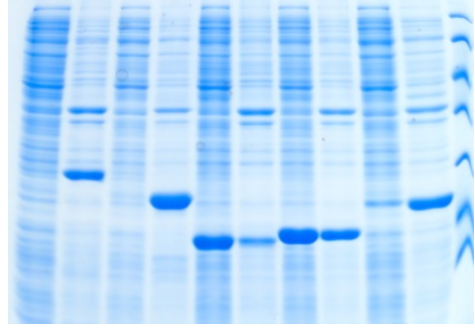

AVE002\_ORF3 15 °C  
AVE003\_ORF2 15 °C  
AVE005 15 °C  
AVE015 15 °C  
AVE023 15 °C

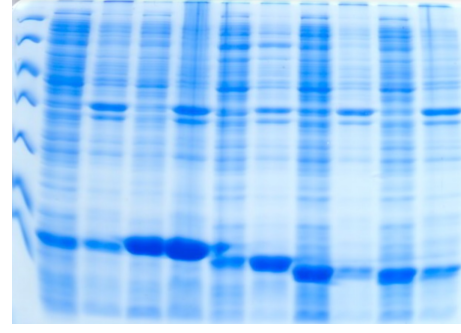

EMM000\_ORF2 15 °C  
EMS001 15 °C  
EMS003 15 °C  
EMS007 15 °C  
EOC000 15 °C

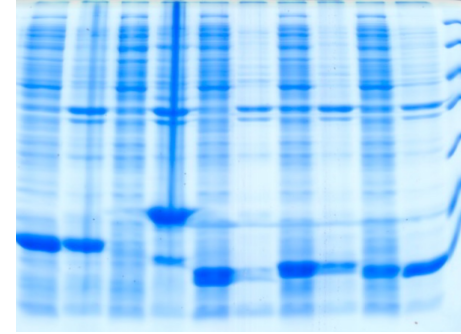

EOC005 15 °C  
ESE005 15 °C  
ESE006 15 °C  
ESE008 15 °C  
ESE009 15 °C

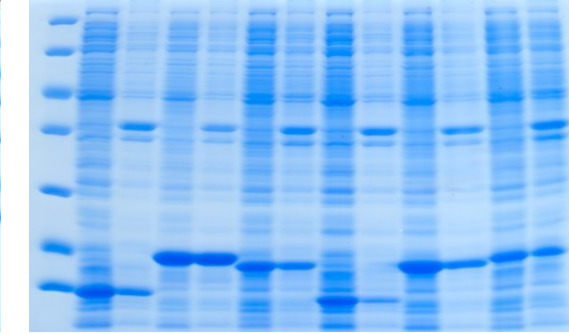

M2  
M2  
ESE017 15 °C  
ESE019 15 °C  
ESE021 15 °C  
ESE022 15 °C  
ESE024 15 °C  
ESE025 15 °C

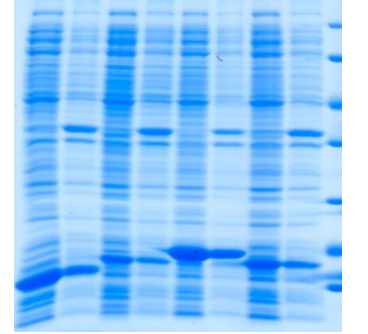

Hubei8 15 °C  
Shahe3 15 °C  
Wenzhou4 15 °C  
MB 15 °C  
M2

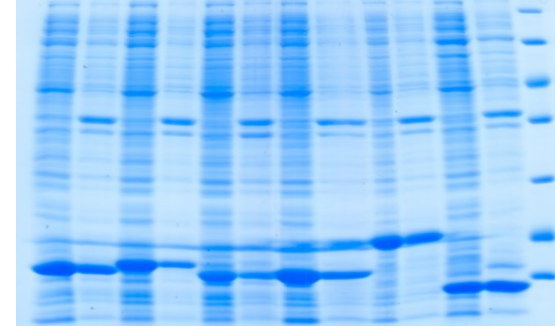

ESE030 15 °C  
ESE037 15 °C  
ESE041 15 °C  
ESE046 15 °C  
ESE058 15 °C  
ESO000 15 °C  
M2

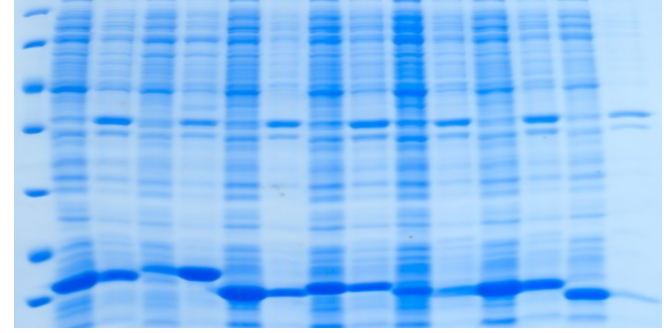

M2  
ESO001\_ORF2 15 °C  
ESO010 15 °C  
Beihai3 15 °C  
Beihai9 15 °C  
Beihai13 15 °C  
Hubei3 15 °C  
Hubei6 15 °C

**Figure S2.** Solubility of the metagenomic ssRNA phage CPs at 37°C and 15°C. The samples represent the soluble (s) and insoluble (d) cellular protein fractions after the CPs were produced at the indicated temperature. The proteins were produced at 15 °C only if they were completely insoluble at 37 °C. M2 – lanes with MW marker - 14, 18, 25, 35, 45, 66 and 116 kDa. M1 and M2 – protein molecular weight markers (M1: bands of 10, 15, 25, 35, 40, 55, 70, 100, 130 and 180 kDa; M2: bands of 14, 18, 25, 35, 45, 66 and 116 kDa).



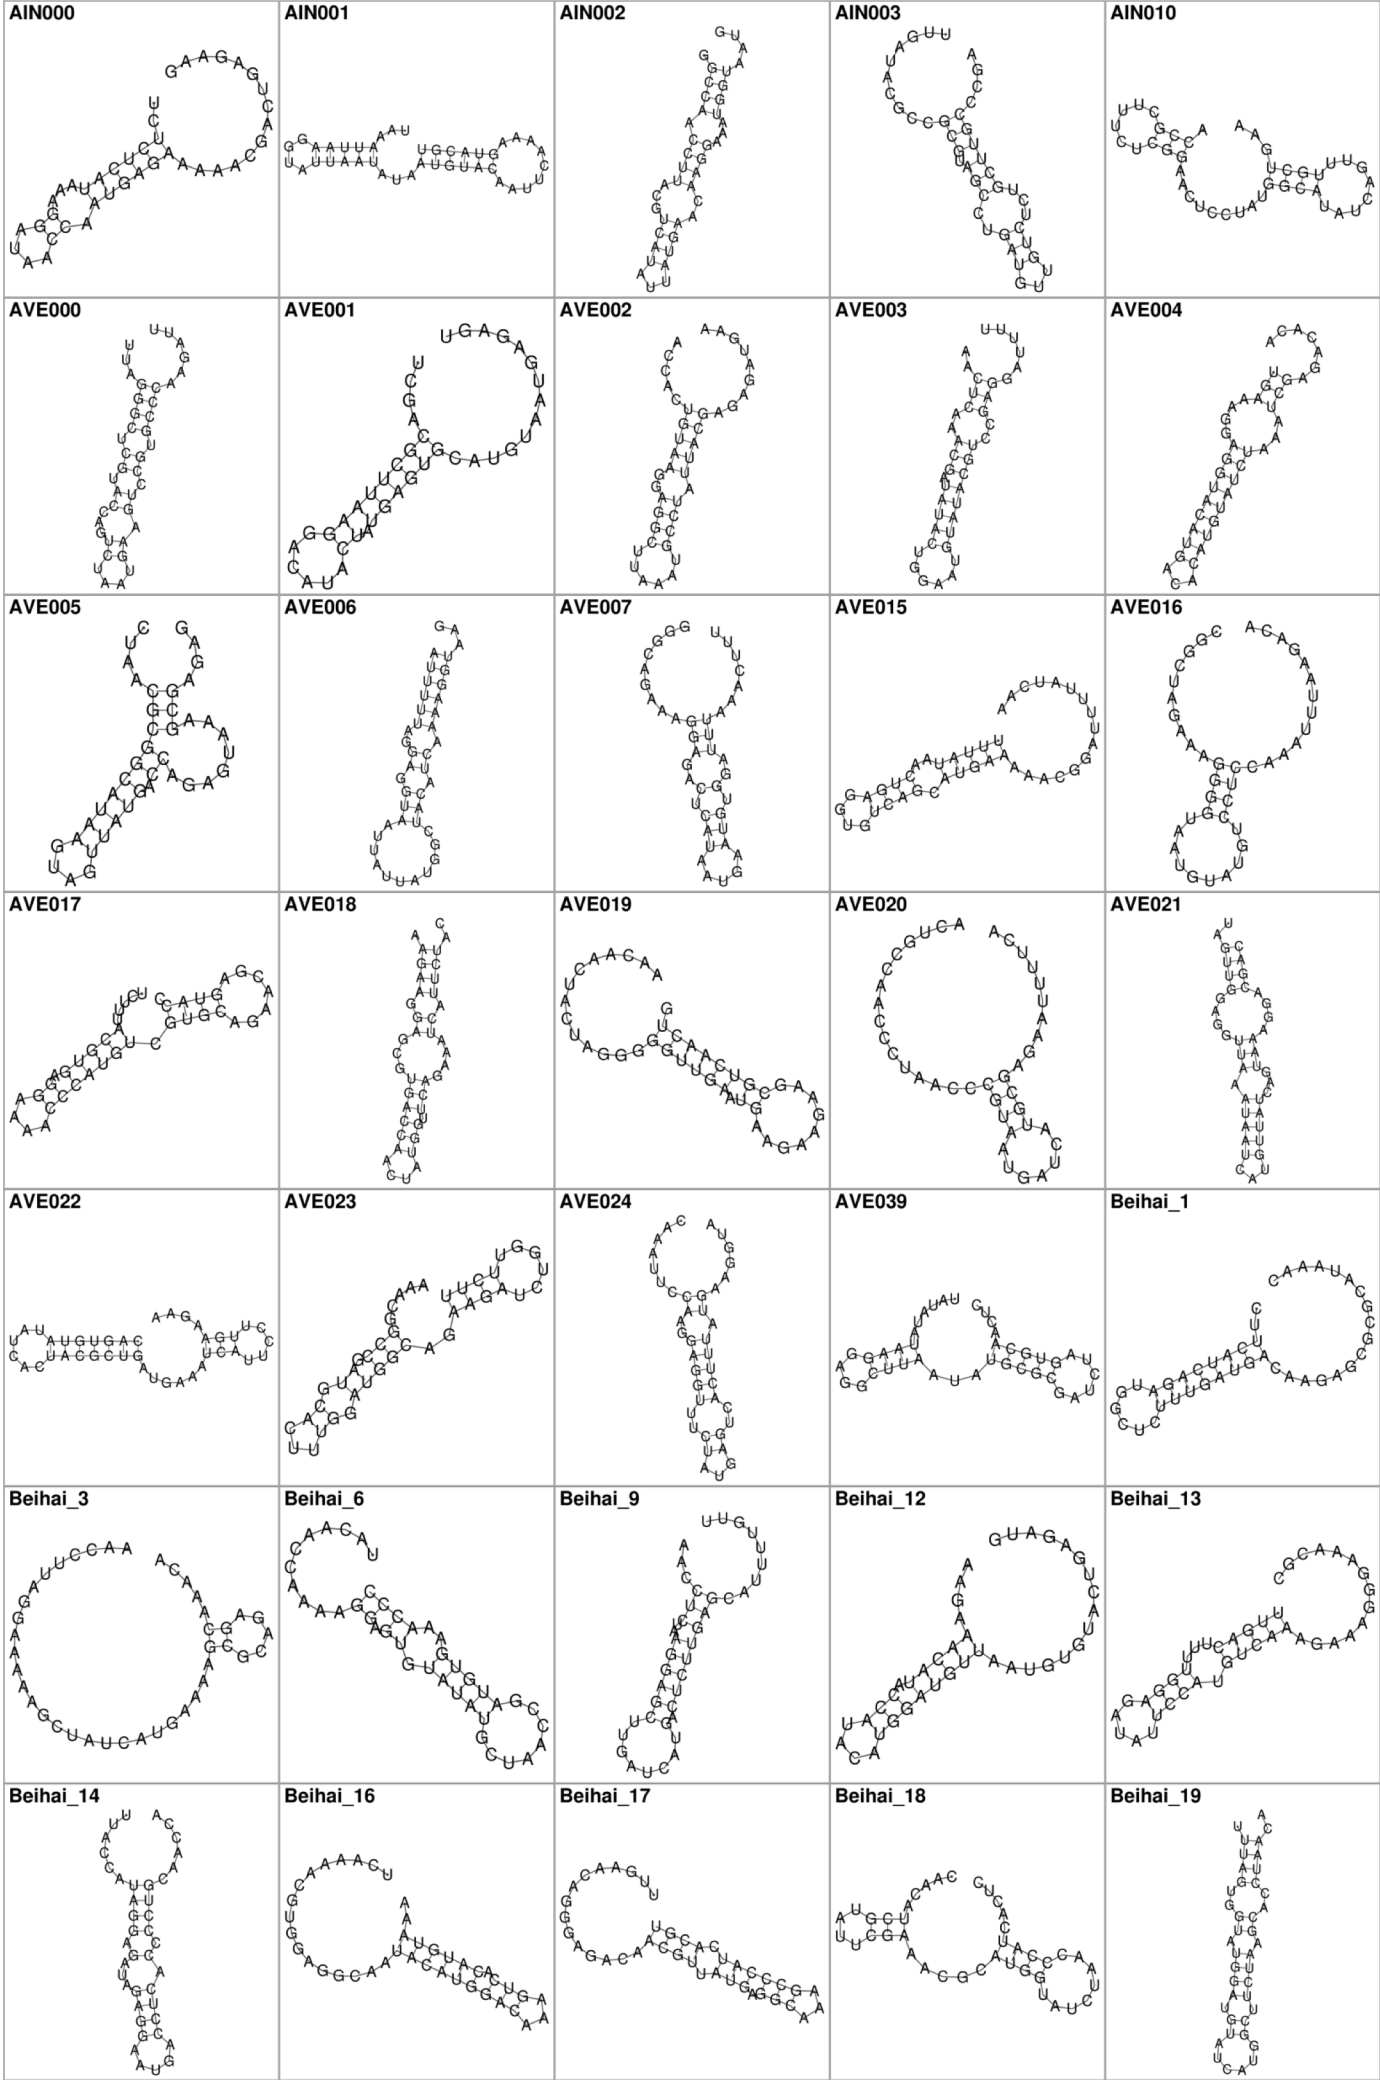

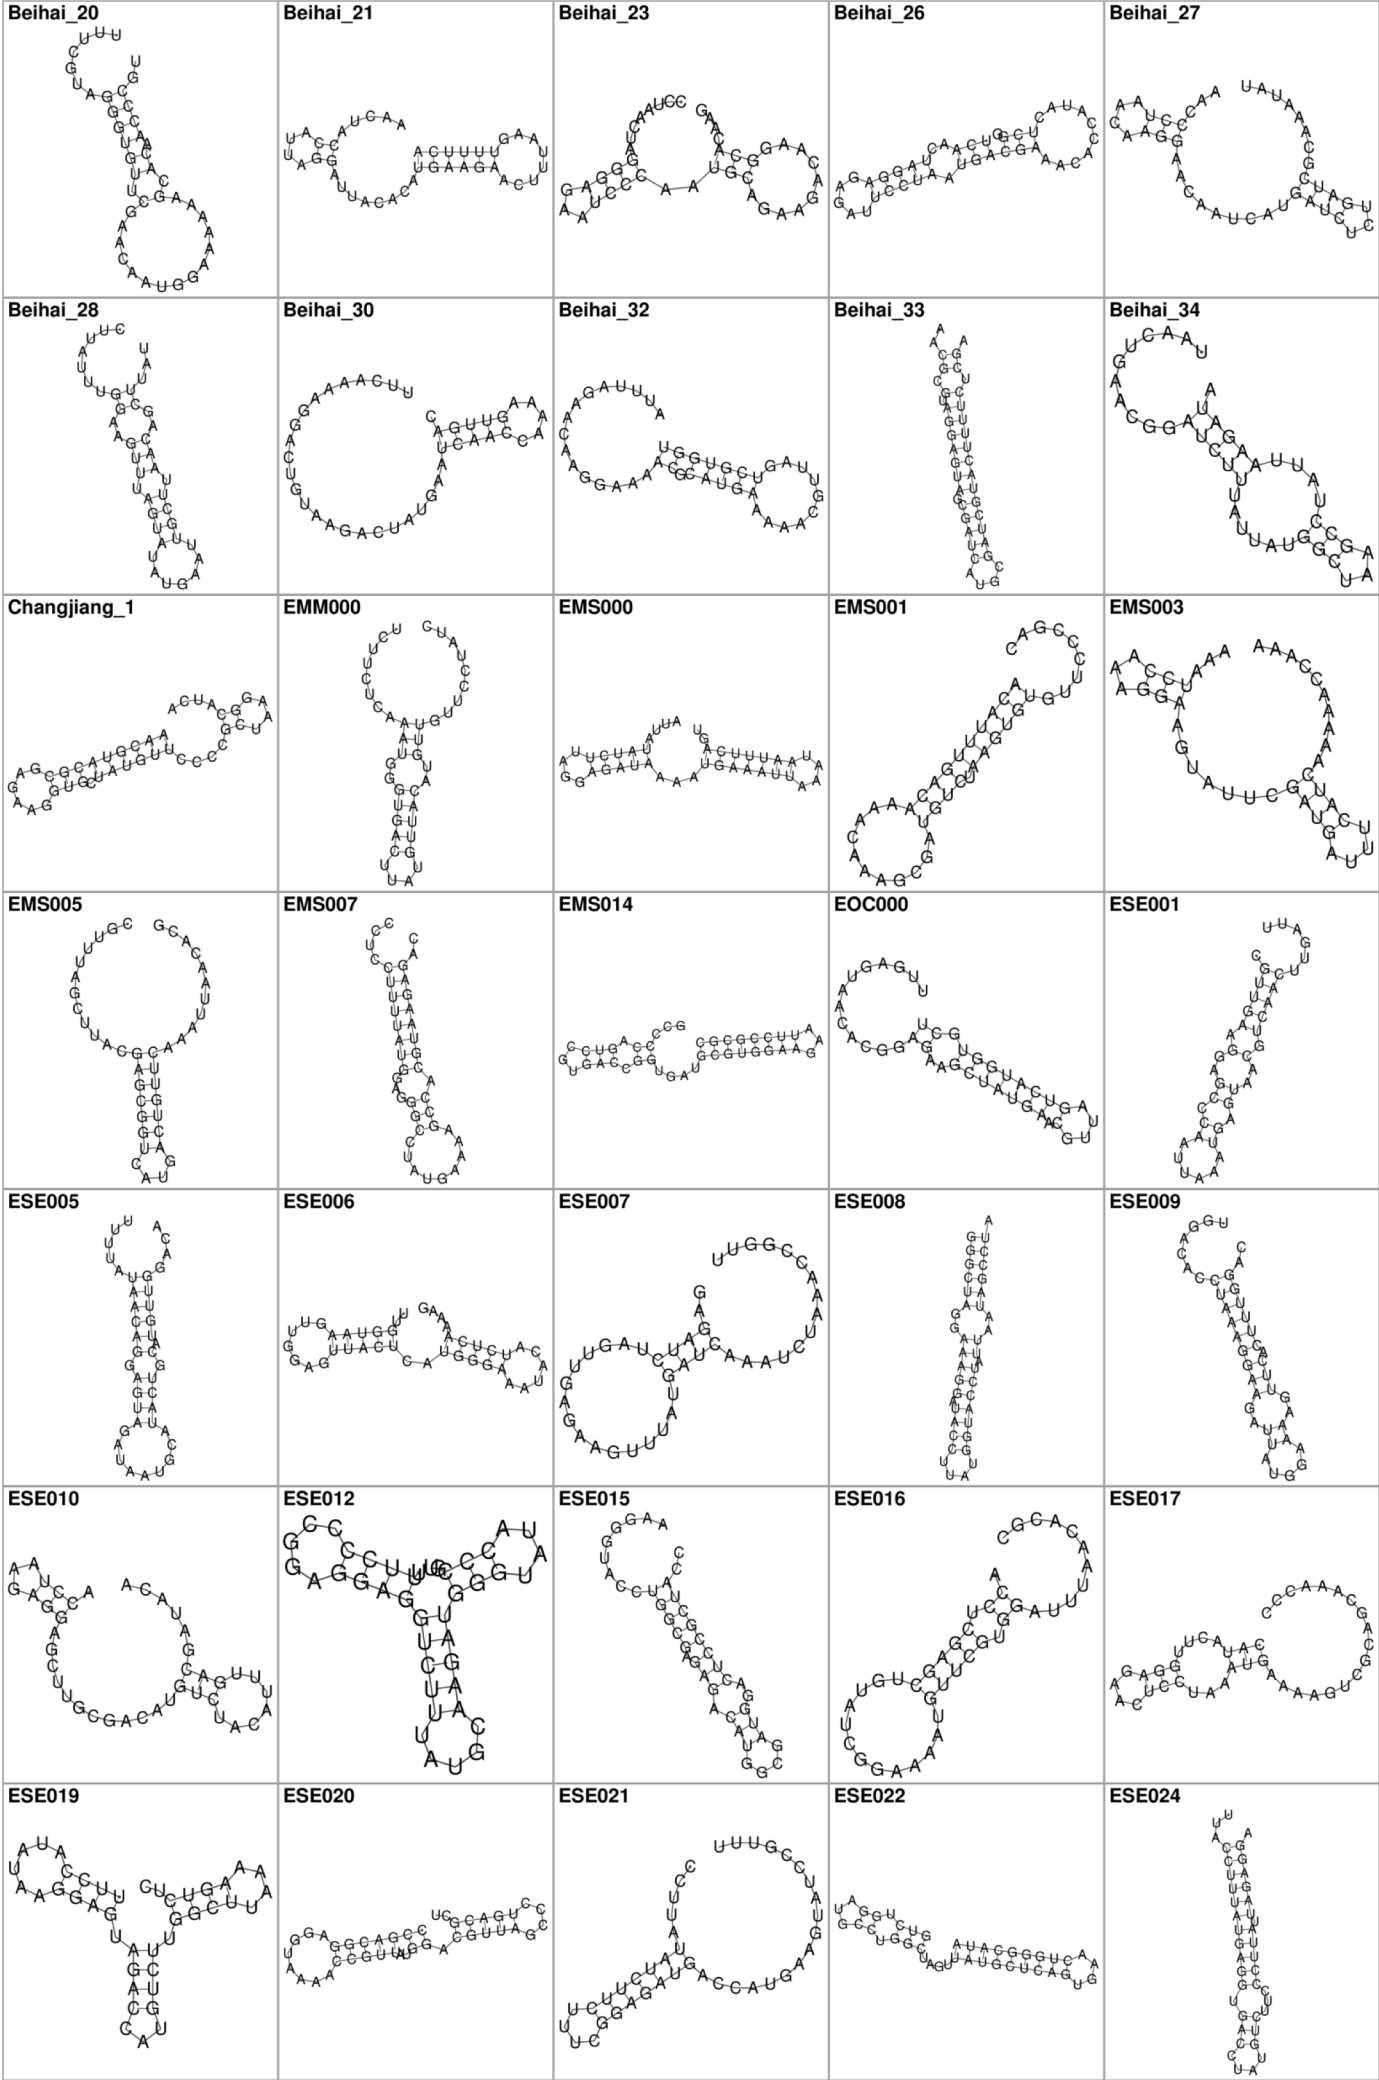

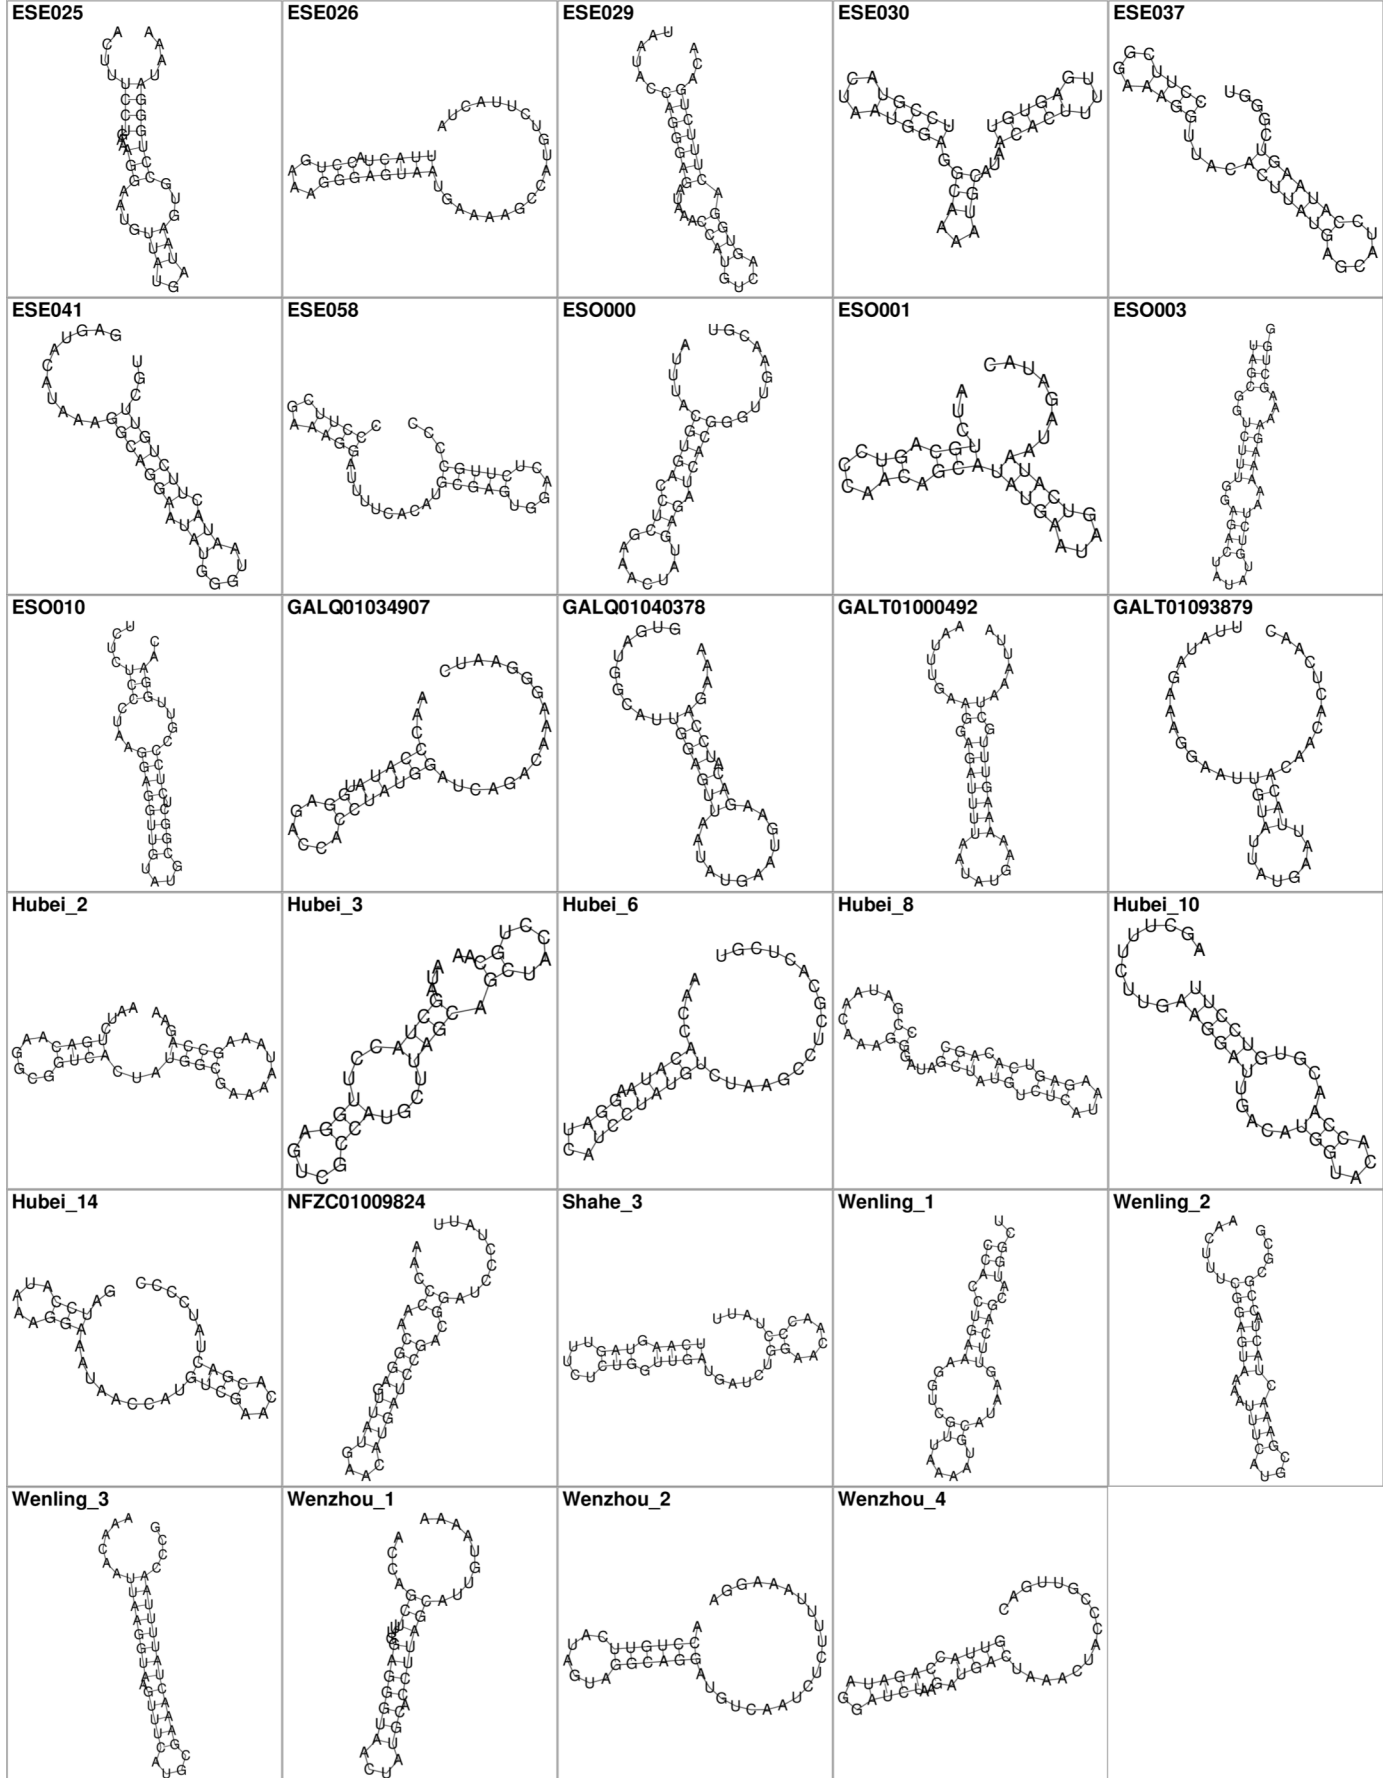

**Figure S3.** Predicted RNA hairpin structures at the beginning of the replicase gene in the metagenomic ssRNA phage genome sequences. A region flanking 20 nucleotides in each direction from the first nucleotide of the replicase gene was used for the prediction.
